# Supplementary material
Source: Springer Nature journal article supplement (https://www.springermedizin.de/resource/supplementary/12888_2011_914_MOESM1_ESM.pdf/9478504)

Non-Social Cognition

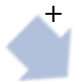

Perspective Taking

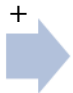

Stigma Sensitivity

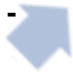

Self-Reflection

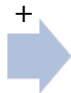

Insight

Supplement: MOESM1 [file 9478504]
